# Supplementary material for: Practice postcode versus patient population: a comparison of data sources in England and Scotland
Source: Springer Nature journal article supplement (doi:10.1186/1476-072x-7-37), 2008-01-01
Supplement: Additional file 1 [file 1476-072x-7-37-s1.doc]

# Additional Table 1: Age-sex standardised results for QOF prevalence rates between the least and most deprived deciles for practice and population assigned data

|  | **Scotland: Prevalence rates based on practice**  **postcode** | | | **Scotland: Prevalence rates based on practice**  **population** | | |
| --- | --- | --- | --- | --- | --- | --- |
|  | **Least**  **deprived**  **decile** | **Most**  **deprived**  **decile** | **Difference** | **Least**  **deprived**  **decile** | **Most**  **deprived**  **decile** | **Difference** |
| CHD | 89.67 | 115.69 | 26.03 [<0.001] | 77.38 | 126.01 | 48.63 [<0.001] |
| Diabetes | 91.12 | 112.71 | 21.59 [<0.001] | 78.00 | 119.55 | 41.56 [<0.001] |
| Stroke | 93.56 | 114.44 | 20.88 [0.03] | 84.00 | 125.04 | 41.04[<0.001] |
| BP | 96.09 | 103.96 | 7.87 [0.27] | 90.50 | 110.21 | 19.71 [0.06] |
| COPD | 76.65 | 153.36 | 76.71 [<0.001] | 49.91 | 194.37 | 144.46 [<0.001] |
| Asthma | 96.68 | 100.98 | 4.30 [0.68] | 91.74 | 104.06 | 12.32 [0.11] |
| Thyroid | 96.35 | 91.77 | -4.58 [0.34] | 101.31 | 86.89 | -14.43 [0.09] |
| Epilepsy | 89.43 | 121.02 | 31.59 [<0.001] | 75.64 | 133.39 | 57.75 [<0.001] |
